# Supplementary material
Source: PubMed Central journal article supplement (PMC7541801)

Effect of fasting and 80% KA dose on seizure development

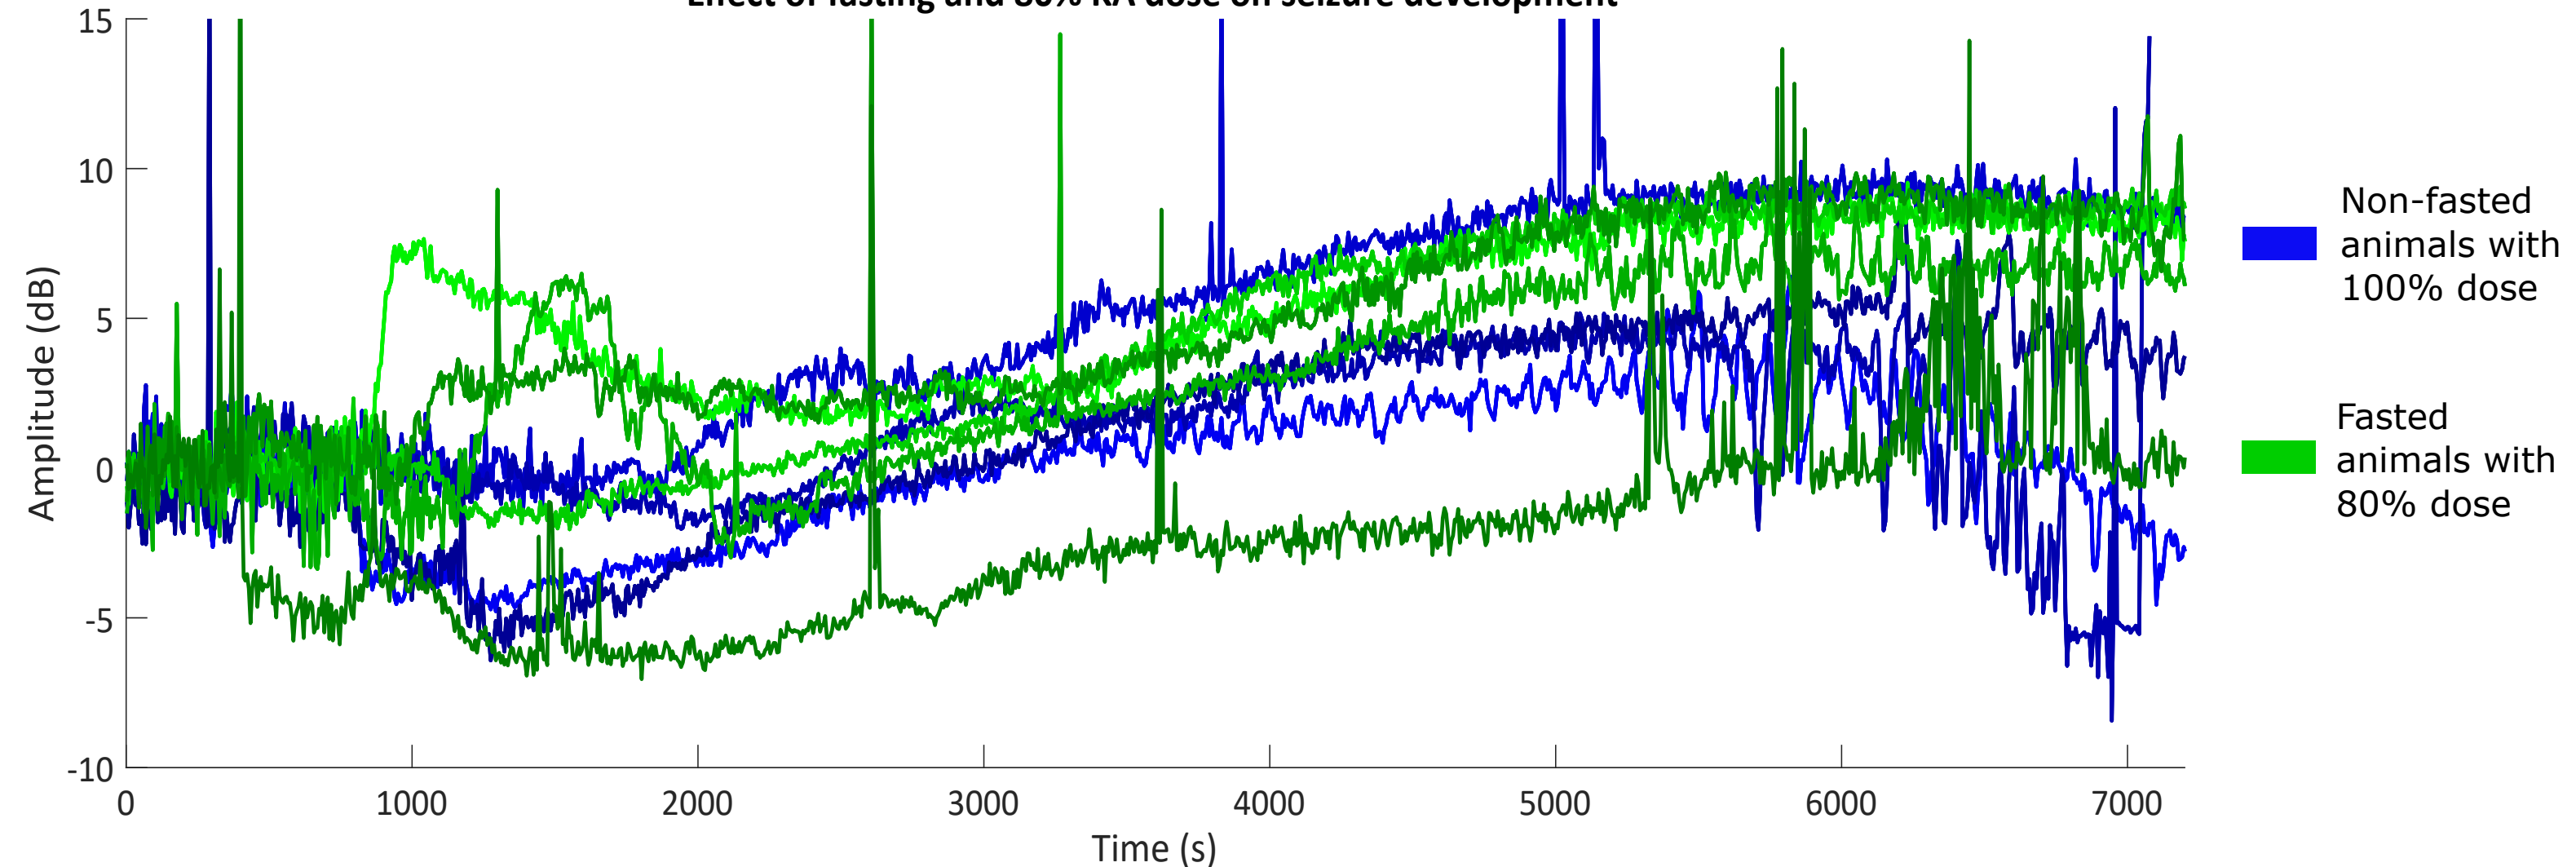

Supplement: NIHMS1605803-supplement-3.pdf [file NIHMS1605803-supplement-3.pdf]
